# Supplementary material
Source: HighWire-hosted journal article supplement (https://www.genetics.org/content/suppl/2010/01/11/genetics.109.113522)
Supplement: TableS1.pdf [file TableS1.pdf]

**TABLE S1****Oligonucleotide primers used in this work**

| Sequence                     | Type <sup>#</sup> | Gene               | Species                | Purpose     |
|------------------------------|-------------------|--------------------|------------------------|-------------|
| 5'CTGGCAGGATAGGTTCAATAC 3'   | F                 | <i>ran-like</i>    | <i>D. melanogaster</i> | Genomic PCR |
| 5'CAAAGATCATCGTTGCAC3'       | R                 | <i>ran-like</i>    | <i>D. melanogaster</i> | Genomic PCR |
| 5'GCTGGCGGGATAAGTTC3'        | F                 | <i>ran-like</i>    | <i>D. simulans</i>     | Genomic PCR |
| 5'CCATGGGCACGAAGTAAG3'       | R                 | <i>ran-like</i>    | <i>D. simulans</i>     | Genomic PCR |
| 5'ATTACACAAGCCGCTCC3'        | F                 | <i>ran-like</i>    | <i>D. yakuba</i>       | Genomic PCR |
| 5'ACGCAGAAGGGGAAAAG3'        | R                 | <i>ran-like</i>    | <i>D. yakuba</i>       | Genomic PCR |
| 5'ATGCCCTCTCAATCCCCAC3'      | F                 | <i>Da_Ntf-2r</i>   | <i>D. ananassae</i>    | Genomic PCR |
| 5'TTATTCCGTGTCGTGGATATTC3'   | R                 | <i>Da_Ntf-2r</i>   | <i>D. ananassae</i>    | Genomic PCR |
| 5'ATGCCCTCTCAATCCCCAC3'      | F                 | <i>Da_Ntf-2r</i>   | <i>D. atripex</i>      | Genomic PCR |
| 5'TTATTCCGTGTCGTGGATATTC3'   | R                 | <i>Da_Ntf-2r</i>   | <i>D. atripex</i>      | Genomic PCR |
| 5'CAATCTCCTCGTGCAGACG3'      | F                 | <i>Da_ran-like</i> | <i>D. ananassae</i>    | Genomic PCR |
| 5'CGGAGTGTCCAATTTGTGCG3'     | R                 | <i>Da_ran-like</i> | <i>D. ananassae</i>    | Genomic PCR |
| 5'CAATCTCCTCGTGCAGACG3'      | F                 | <i>Da_ran-like</i> | <i>D. atripex</i>      | Genomic PCR |
| 5'CGGAGTGTCCAATTTGTGCG3'     | R                 | <i>Da_ran-like</i> | <i>D. atripex</i>      | Genomic PCR |
| 5'GATATTGGCAAGGGATTCGTC3'    | F                 | <i>Dntf-2</i>      | <i>D. ananassae</i>    | RT-PCR      |
| 5'CGACCAAGAACGTTAATCAG3'     | R                 | <i>Dntf-2</i>      | <i>D. ananassae</i>    | RT-PCR      |
| 5' CCAATGGGCCAGGAATTTGTG 3'  | F                 | <i>Da_Ntf-2r</i>   | <i>D. ananassae</i>    | RT-PCR      |
| 5'GCAGTCTTCCCAGGACACTC3'     | R                 | <i>Da_Ntf-2r</i>   | <i>D. ananassae</i>    | RT-PCR      |
| 5'CACATTCAAGTGCGTACTCGTC3'   | F                 | <i>ran</i>         | <i>D. ananassae</i>    | RT-PCR      |
| 5'TGGCAACGAATTCCAGGTTGG3'    | R                 | <i>ran</i>         | <i>D. ananassae</i>    | RT-PCR      |
| 5'GTGGCAGCGGTGATGGTATTC3'    | F                 | <i>Da_ran-like</i> | <i>D. ananassae</i>    | RT-PCR      |
| 5'CTTGCCGAAATGTCGTAG3'       | R                 | <i>Da_ran-like</i> | <i>D. ananassae</i>    | RT-PCR      |
| 5'ATTGTGACCACAGTCGGTTC 3'    | F                 | <i>Gapdh2</i>      | <i>D. ananassae</i>    | RT-PCR      |
| 5'GTCGTACCAAGAGATCAGCTTCAC3' | R                 | <i>Gapdh2</i>      | <i>D. ananassae</i>    | RT-PCR      |
| 5'AGGACATTGGCAAGGGCTTTC3'    | F                 | <i>Dntf-2</i>      | <i>D. grimshawi</i>    | RT-PCR      |
| 5'TGGGCTGAGAGTCAACTGTGG 3'   | R                 | <i>Dntf-2</i>      | <i>D. grimshawi</i>    | RT-PCR      |
| 5'CCGTTGGCAAAGGTTTTGTCC3'    | F                 | <i>Dg_Ntf-2r</i>   | <i>D. grimshawi</i>    | RT-PCR      |
| 5'CAGTTGCGAATAGGAGTGTGGTG3'  | R                 | <i>Dg_Ntf-2r</i>   | <i>D. grimshawi</i>    | RT-PCR      |
| 5'CAAGGACCGCAAGGTCAAAG3'     | F                 | <i>ran</i>         | <i>D. grimshawi</i>    | RT-PCR      |
| 5'TGCAGCTGCCAGTCTCTGTG3'     | R                 | <i>ran</i>         | <i>D. grimshawi</i>    | RT-PCR      |
| 5'GCTGTGTGGCAACAAAGTCG3'     | F                 | <i>Dg_ran-like</i> | <i>D. grimshawi</i>    | RT-PCR      |
| 5'CCTCCTGCAAATCTCGTTCCG3'    | R                 | <i>Dg_ran-like</i> | <i>D. grimshawi</i>    | RT-PCR      |
| 5'GGTGCTGCCAAAACATCAT3'      | F                 | <i>Gapdh</i>       | <i>D. grimshawi</i>    | RT-PCR      |
| 5'GCTGAGGAAATCGGTGGAGAC3'    | R                 | <i>Gapdh</i>       | <i>D. grimshawi</i>    | RT-PCR      |

#F and R refer to forward and reverse, respectively
